# Supplementary material for: PHF3 regulates neuronal gene expression through the Pol II CTD reader domain SPOC
Source: PubMed Central journal article supplement (PMC8526623; doi:10.1038/s41467-021-26360-2), 2021-10-19
Supplement: 41467_2021_26360_MOESM3_ESM.pdf [file 41467_2021_26360_MOESM3_ESM.pdf]

## **Description of Additional Supplementary Files**

### Supplementary Dataset 1:

Mass spectrometry analysis of PHF3 interactome in HEK293T cells.

### Supplementary Dataset 2:

ChIP-seq of PHF3-GFP, Pol II F-12, pS2, pS5, pS7, TFIIIS and H3K27me3 in PHF3 WT, KO and  $\Delta$ SPOC HEK293T cells.

### Supplementary Dataset 3:

PRO-seq and RNA-seq analysis in PHF3 WT, KO and  $\Delta$ SPOC HEK293T cells.

### Supplementary Dataset 4:

PRO-seq analysis of elongation rate in PHF3 WT, KO and  $\Delta$ SPOC HEK293T cells.

### Supplementary Dataset 5:

SLAM-seq analysis in PHF3 WT, KO and  $\Delta$ SPOC HEK293T cells.

### Supplementary Dataset 6:

RNA-seq analysis in mPHF3 WT and KO mES cells.

### Supplementary Dataset 7:

Raw data for graphs, plots, gels and western blots shown in main and supplementary figures.
